# Supplementary material for: Phototransduction in a supramolecular cascade: a mimic for essential features of the vision process
Source: Royal Society of Chemistry journal article supplement (doi:10.1039/d3cc00384a), 2023-01-01
Supplement: d3cc00384a1.pdf [file d3cc00384a1.pdf]

## Electronic Supporting Information (10 pages)

### **Phototransduction in a supramolecular cascade: a mimic for essential features of the vision process**

Jialei Chen Wu,<sup>a</sup> Patrícia Máximo,<sup>b</sup> Patricia Remón,<sup>a</sup> A. Jorge Parola,<sup>b</sup> Nuno Basílio,<sup>b</sup> and Uwe Pischel\*<sup>a</sup>

[<sup>a</sup>] CIQSO – Center for Research in Sustainable Chemistry, University of Huelva, Campus de El Carmen s/n, E-21007 Huelva, Spain.

[<sup>b</sup>] Laboratório Associado para a Química Verde (LAQV) Rede de Química e Tecnologia (REQUIMTE), Departamento de Química, Faculdade de Ciências e Tecnologia, Universidade NOVA de Lisboa, 2829-516 Caparica, Portugal

\* Corresponding author: [uwe.pischel@diq.uhu.es](mailto:uwe.pischel@diq.uhu.es) (U.P.)

## Table of contents

|                                                                |     |
|----------------------------------------------------------------|-----|
| 1. General methods and materials                               | S2  |
| 2. $^1\text{H}$ NMR spectra                                    | S3  |
| 3. NMR titration for binding of <b>1o</b> and <b>1c</b> by CB7 | S6  |
| 4. Simulation of speciation                                    | S8  |
| 5. References                                                  | S10 |

## 1. General methods and materials

All chemicals (geranylamine – **GA**, dopamine – **DA**, cucurbit[8]uril – **CB8**, 3-amino-1-adamantol), except **1** and cucurbit[7]uril (**CB7**), were commercially available from Sigma-Aldrich and used as received without further purification. The photoswitch **1** was available from a previous project<sup>1</sup> and **CB7** was prepared by following a published procedure.<sup>2</sup> The water content of **CB7** was determined to 27% by <sup>1</sup>H NMR spectroscopy, using malonic acid as internal standard.

<sup>1</sup>H NMR measurements were done on a Bruker Advanced 500 MHz HPPR2 instrument. Deuterium oxide for NMR measurements (D<sub>2</sub>O, 99.6 atom% D) was purchased from Eurisotope. The residual solvent peak ( $\delta = 4.79$  ppm) was used as reference signal for the <sup>1</sup>H NMR spectra. All measurements were done at room temperature and at pD 5.4. The pD was adjusted by addition of DCl or NaOD and corrected for isotope effects (pD = pH + 0.4).<sup>3</sup>

For the irradiation a TLC lamp (Vilber Lourmat-6.LC, 365 nm) or a 150 W xenon lamp (Oriol GmbH & Co. KG), equipped with a 550 nm optical long-pass filter, was employed.

The NMR titrations were made by consecutive additions of a stock solution of **CB7** (4 mM) to a solution of **DTE 1** (400  $\mu$ M).

## 2. $^1\text{H}$ NMR spectra

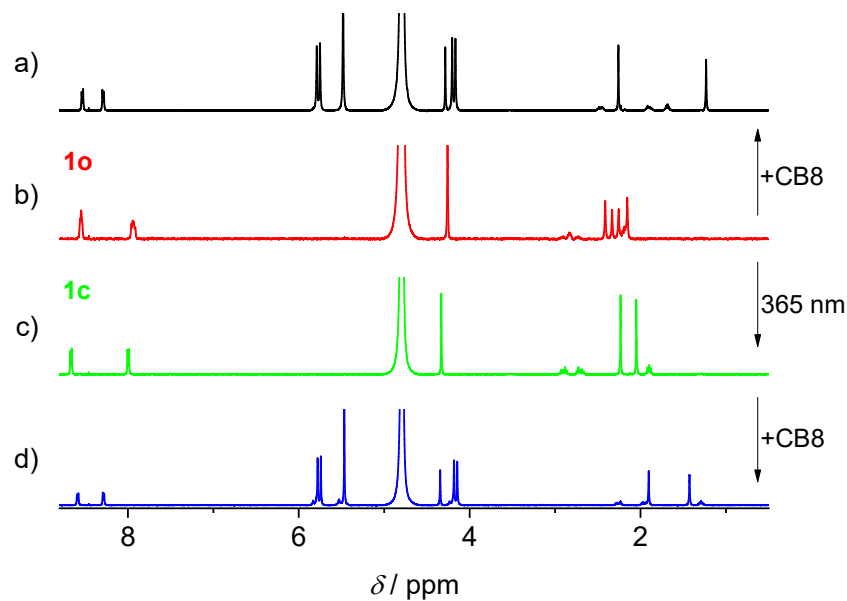

**Figure S1.**  $^1\text{H}$  NMR spectra (all at pD 5.4 in  $\text{D}_2\text{O}$ ) of a) **1o** in presence of CB8 (both at 200  $\mu\text{M}$ ); b) **1o** (200  $\mu\text{M}$ ); c) **1c** (200  $\mu\text{M}$ ; generated by irradiation of **1o** at 365 nm for 15 min); d) **1c** in the presence of CB8 (both at 200  $\mu\text{M}$ ).

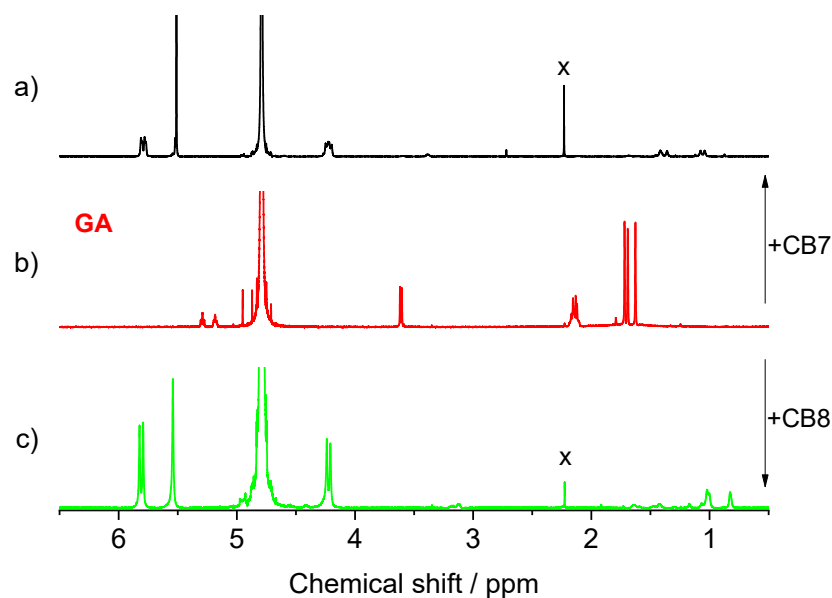

**Figure S2.**  $^1\text{H}$  NMR spectra (all at pD 5.4 in  $\text{D}_2\text{O}$ ) of a) **GA** in presence of CB7 (both at 500  $\mu\text{M}$ ); b) **GA** (500  $\mu\text{M}$ ); c) **GA** in presence of CB8 (both at 500  $\mu\text{M}$ ). x denotes a small solvent impurity (acetone).

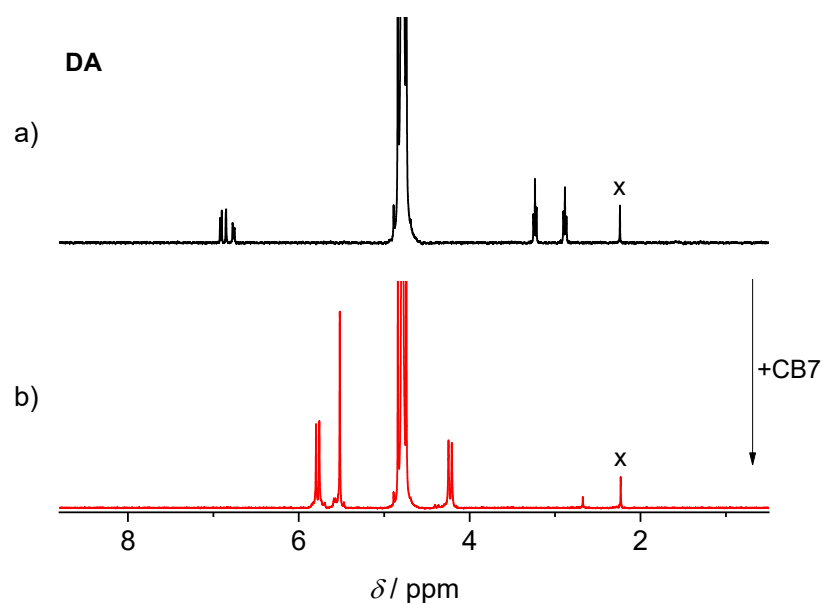

**Figure S3.**  $^1\text{H}$  NMR spectra (all at pD 5.4 in  $\text{D}_2\text{O}$ ) of a) **DA** (500  $\mu\text{M}$ ); b) **DA** in the presence of **CB7** (both at 500  $\mu\text{M}$ ). x denotes a small solvent impurity (acetone).

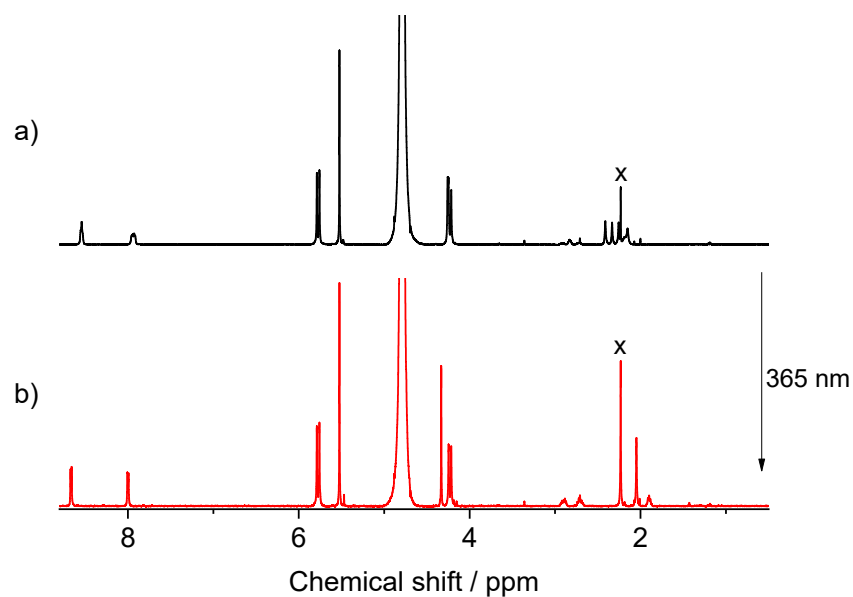

**Figure S4.**  $^1\text{H}$  NMR spectra (all at pD 5.4 in  $\text{D}_2\text{O}$ ) of a) **1o** (300  $\mu\text{M}$ ), **DA**, **CB7** (both at 200  $\mu\text{M}$ ); b) mixture a) after irradiation at 365 nm for 15 min. No release of **DA** was observed. x denotes a small solvent impurity (acetone); note that in spectrum b) the solvent impurity overlaps with one of the signals of **1c**.

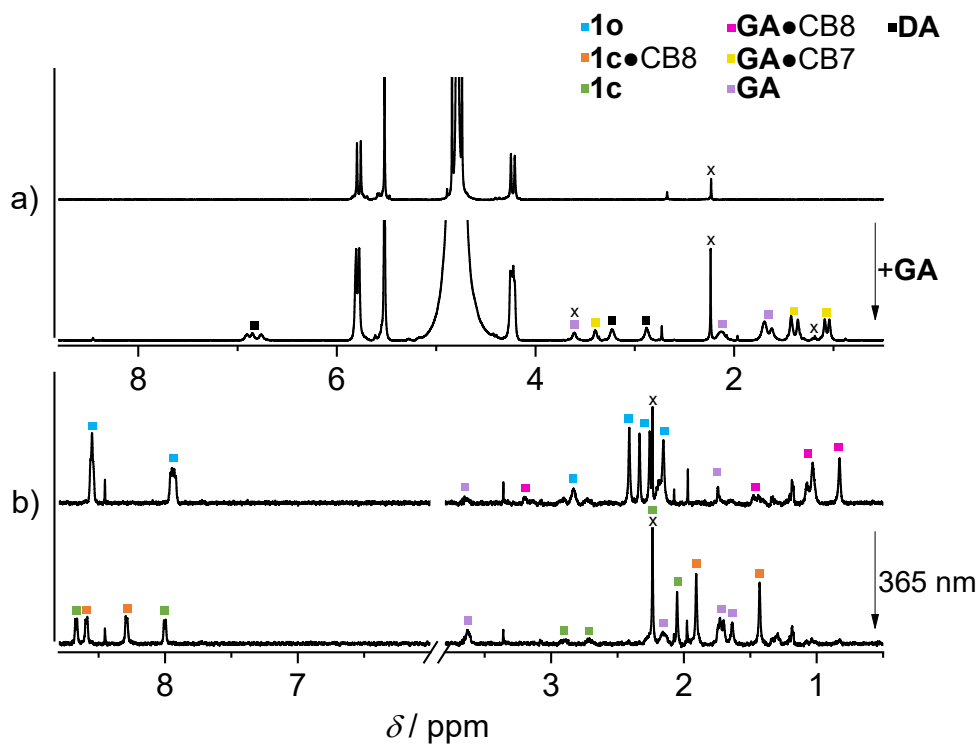

**Figure S5.** a)  $^1\text{H}$  NMR spectra of **DA**, **CB7** (both at  $200\ \mu\text{M}$ ) and after addition of **GA** ( $200\ \mu\text{M}$ ); b)  $^1\text{H}$  NMR spectra **1o** ( $300\ \mu\text{M}$ ) **GA** and **CB8** (both at  $200\ \mu\text{M}$ ) and after irradiation at  $365\ \text{nm}$  (yielding **1c**) for  $15\ \text{min}$ ; all at  $\text{pD}\ 5.4$  in  $\text{D}_2\text{O}$ . x denotes solvent impurities (acetone, diethylether).

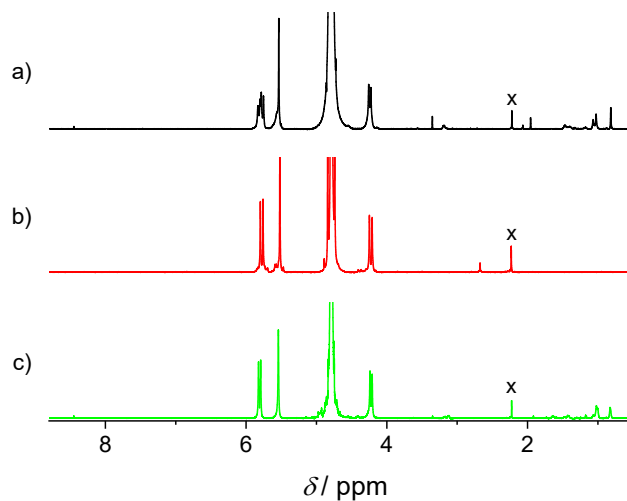

**Figure S6.**  $^1\text{H}$  NMR spectra (all at  $\text{pD}\ 5.4$  in  $\text{D}_2\text{O}$ ) of a) **GA**, **CB8**, **DA**, and **CB7** (all at  $200\ \mu\text{M}$ ); b) **DA** in presence of **CB7** (both at  $500\ \mu\text{M}$ ); c) **GA** in presence of **CB8** (both at  $500\ \mu\text{M}$ ). x denotes a small solvent impurity (acetone).

### 3. NMR titration for binding of **1o** and **1c** by CB7

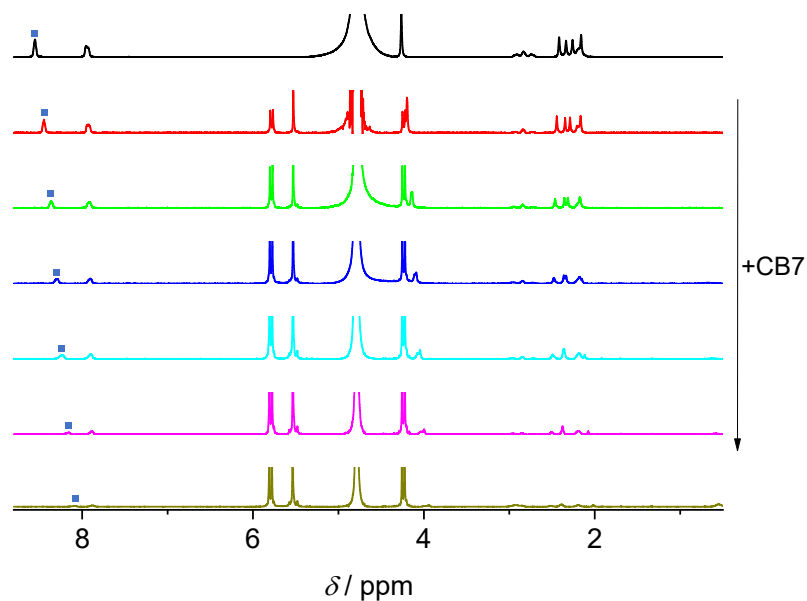

**Figure S7.** Selected <sup>1</sup>H NMR spectra (all at pD 5.4 in D<sub>2</sub>O) for the titration of **1o** (400  $\mu$ M) upon consecutive additions of a stock solution of CB7 (4 mM).

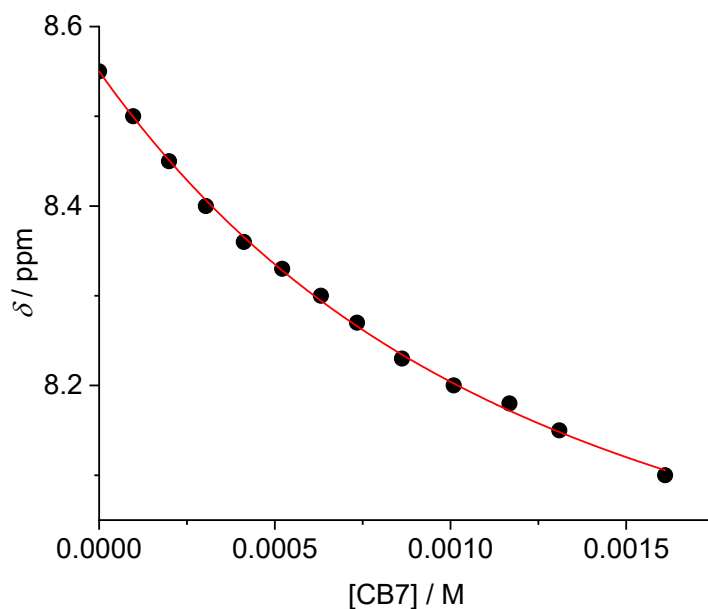

**Figure S8.** Fitting of the titration curve of **1o** with CB7 according to a 1:1 binding model.

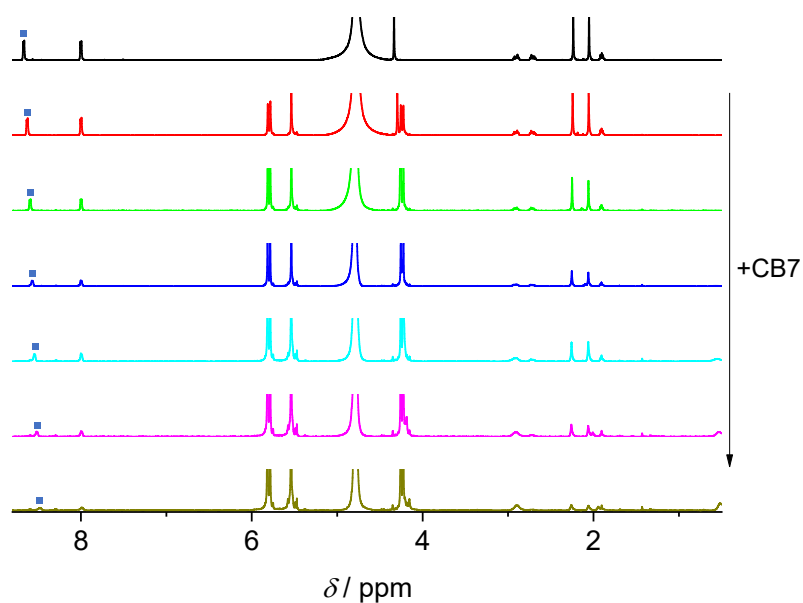

**Figure S9.** Selected  $^1\text{H}$  NMR spectra (all at pD 5.4 in  $\text{D}_2\text{O}$ ) for the titration of **1c** ( $400\ \mu\text{M}$ ) upon consecutive additions of a CB7 stock solution ( $4\ \text{mM}$ ).

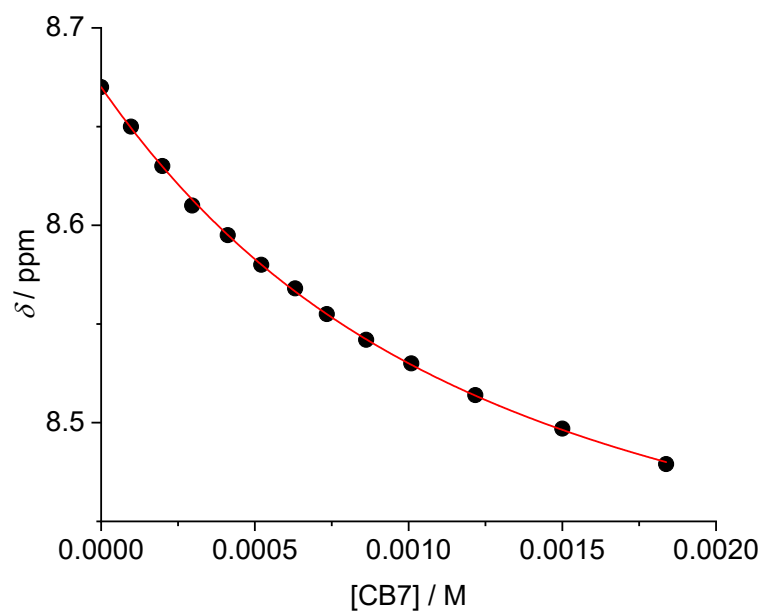

**Figure S10.** Fitting of the titration curve of **1c** with CB7 according to a 1:1 binding model.



#### 4. Speciation simulation

The algorithm used to simulate the speciation of the multicomponent system containing two hosts (CB7 and CB8) and 3 guests (DTE **1o/1c**, **GA**, and **DA**) was based on a system of 5 equations constructed from the mass balance and equilibrium expressions. This system of equations was then numerically solved using the Newton-Raphson algorithm implemented in a conventional spreadsheet software to calculate the equilibrium concentrations of all species from the binding constants and initial concentrations.

Considering the formation of 1:1 complexes, the following binding equilibria applies in a multicomponent mixture containing two hosts ( $H_1$  and  $H_2$ ) and three guests ( $G_1$ ,  $G_2$ , and  $G_3$ ).

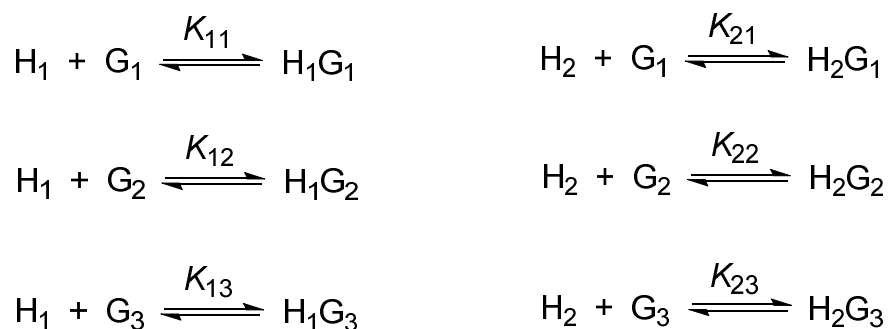

**Scheme S1.** Binding equilibria established in a multicomponent mixture containing two hosts and three guests.

$$[H_1]_0 = [H_1] + [H_1G_1] + [H_1G_2] + [H_1G_3] \quad (S1)$$

$$[H_2]_0 = [H_2] + [H_2G_1] + [H_2G_2] + [H_2G_3] \quad (S2)$$

$$[G_1]_0 = [G_1] + [H_1G_1] + [H_2G_1] \quad (S3)$$

$$[G_2]_0 = [G_2] + [H_1G_2] + [H_2G_2] \quad (S4)$$

$$[G_3]_0 = [G_3] + [H_1G_3] + [H_2G_3] \quad (S5)$$

Replacing the concentrations of the complexes by the product of the respective binding constant with the equilibrium concentrations of free host and guest (*i.e.*,  $[H_iG_j] = K_{ij}[H_i][G_j]$ ) leads to a system of five equations and five unknowns:

$$[H_1] + K_{11}[H_1][G_1] + K_{12}[H_1][G_2] + K_{13}[H_1][G_3] - [H_1]_0 = 0 \quad (S6)$$

$$[H_2] + K_{21}[H_2][G_1] + K_{22}[H_2][G_2] + K_{23}[H_2][G_3] - [H_2]_0 = 0 \quad (S7)$$

$$[G_1] + K_{11}[H_1][G_1] + K_{21}[H_2][G_1] - [G_1]_0 = 0 \quad (S8)$$

$$[G_2] + K_{12}[H_1][G_2] + K_{22}[H_2][G_2] - [G_2]_0 = 0 \quad (S9)$$

$$[G_3] + K_{13}[H_1][G_3] + K_{23}[H_2][G_3] - [G_3]_0 = 0 \quad (S10)$$

The solutions of this system of equations provides the equilibrium concentrations of all free species that can be inserted in the equilibrium equations (*i.e.*,  $[H_iG_j] = K_{ij}[H_i][G_j]$ ) to calculate the concentration of the complexes and construct the speciation plots.

## 5. References

- [1] P. Máximo, M. Colaço, S. R. Pauleta, P. J. Costa, U. Pischel, A. J. Parola and N. Basílio, *Org. Chem. Front.*, **2022**, *9*, 4238-4249.
- [2] C. Márquez, F. Huang and W. M. Nau, *IEEE Trans. Nanobiosci.*, **2004**, *3*, 39-45.
- [3] P. K. Glasoe and F. A. Long, *J. Phys. Chem.*, **1960**, *64*, 188-190.
